# Supplementary material for: In silico identification of novel SARS-COV-2 2′-O-methyltransferase (nsp16) inhibitors: structure-based virtual screening, molecular dynamics simulation and MM-PBSA approaches
Source: PubMed Central journal article supplement (PMC7946047; doi:10.1080/14756366.2021.1885396), 2021-03-09
Supplement: IENZ_A_1885396_SM8724.pdf [file IENZ_A_1885396_SM8724.pdf]

## **Supporting Information**

### **In silico identification of novel SARS-COV-2 2'-O-methyltransferase (nsp16) inhibitors: Structure-based virtual screening, molecular dynamics simulation and MM-PBSA approaches**

Mahmoud A. El Hassab<sup>\*</sup>, Tamer M. Ibrahim, Sara T. Al-Rashood, Amal Alharbi, Razan O. Eskandrani, Wagdy M. Eldehna<sup>\*</sup>

A.

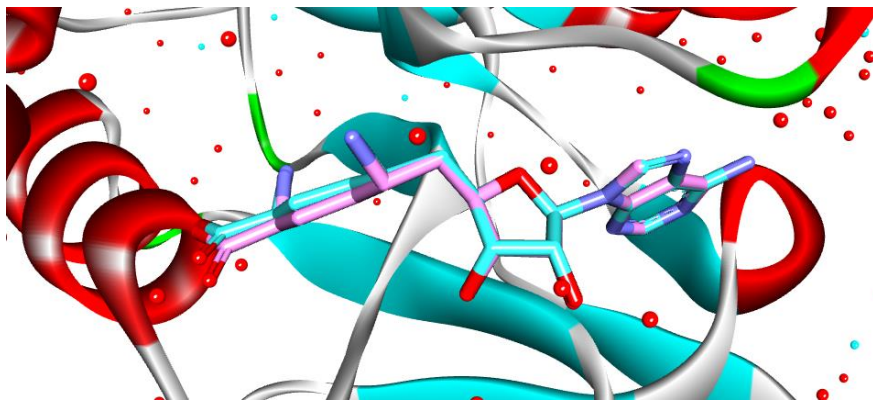

B.

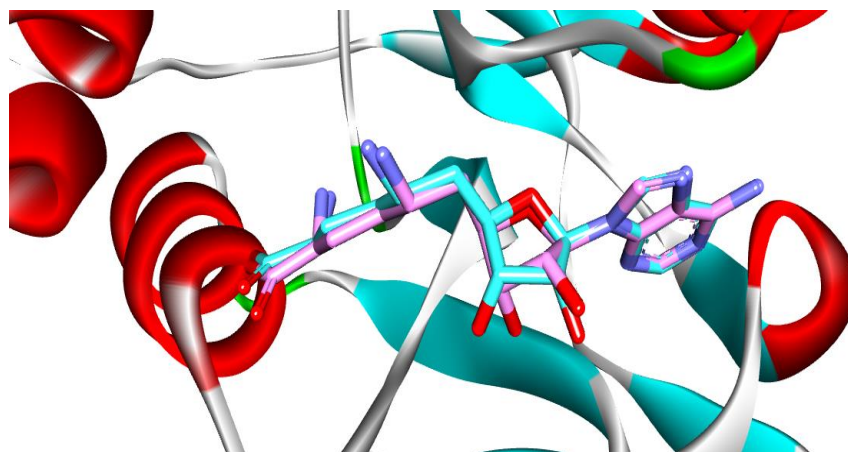

**Figure S1.** Superimposition between co-crystallized (Cyan) and re-docked pose (Pink) of Sinefungine (A) in presence of water (B) in absence of water showing nearly the same binding mode.

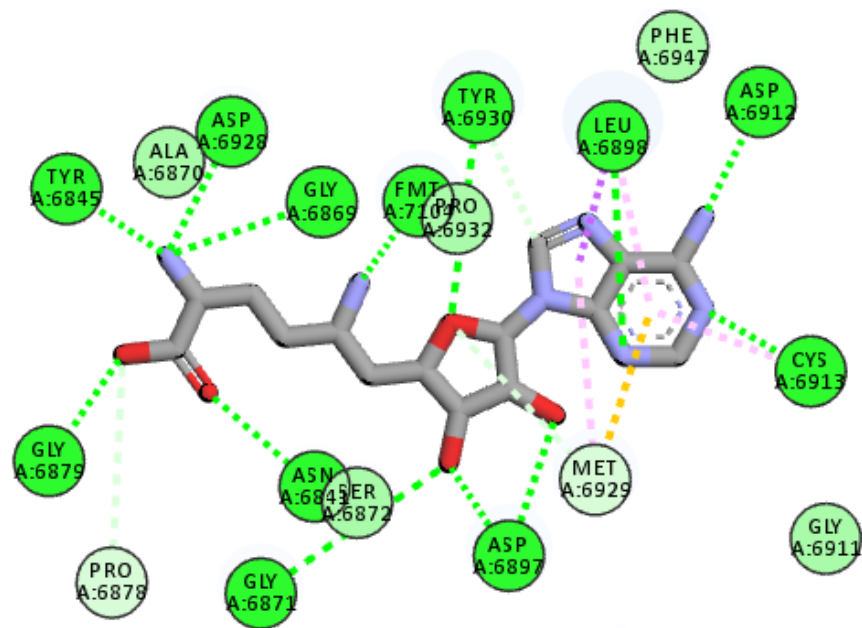

**Figure S2.** Binding of Sinefungine to SARS COV-2 2'-o-methyltransferase (nsp16) before equilibration showing many interactions that may be either significant or not.

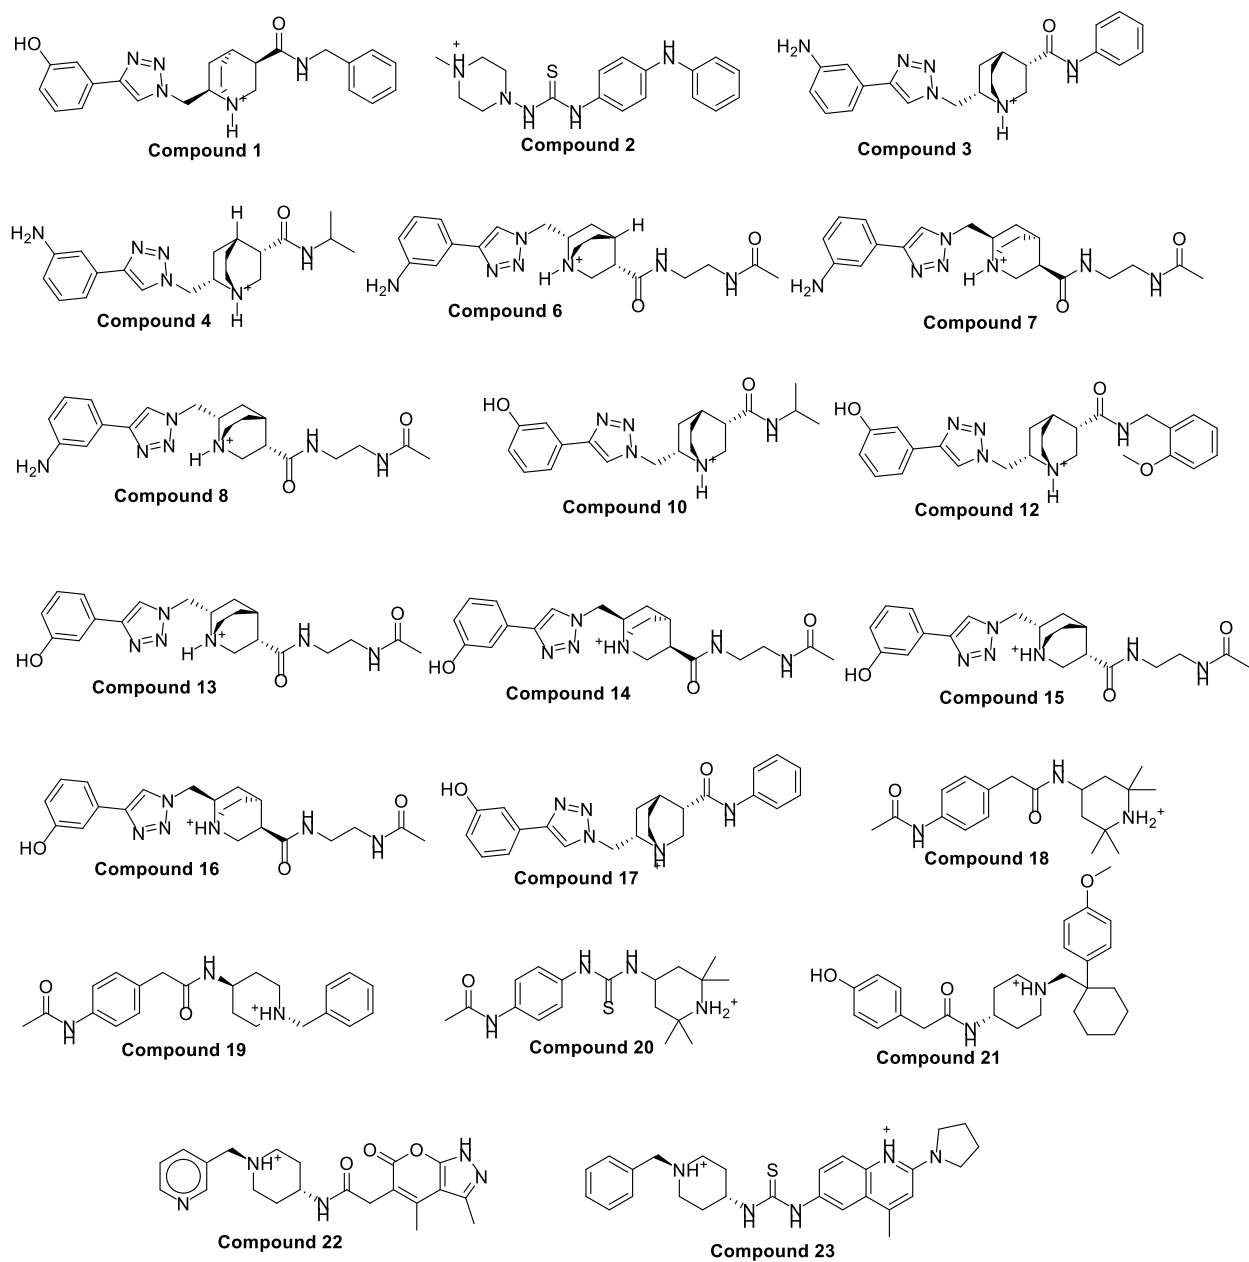

**Figure S3.** Chemical structures for compounds passed the pharmacophore filter and were further screened through docking-based virtual screening.
